# Supplementary material for: Detecting Incident Delirium within Routinely Collected Inpatient Rehabilitation Data: Validation of a Chart-Based Method
Source: Neurol Int. 2021 Dec 9;13(4):701–11. doi: 10.3390/neurolint13040067 (PMC8705493; doi:10.3390/neurolint13040067)
Supplement: Supplementary file 1 [file neurolint-13-00067-s001.zip › neurolint-1392029-supplementary.pdf]

## Supplementary Materials:

**Table S1:** Lists of delirium predictive key words.

| A)                 | B)                  |
|--------------------|---------------------|
| agress*            | agress*             |
| aggress*           | aggress*            |
| <b>delir</b> *     | delir*              |
| <b>disorient</b> * | disorient*          |
| jumbled            | jumbled             |
| <b>hallucin</b> *  | hallucin*           |
| floor mat alarm    | floor mat alarm     |
| <b>confus</b> *    | confus*             |
| uncoperat*         | uncoperat*          |
| uncooperat*        | uncooperat*         |
| nested             | nested              |
| <b>orient</b> *    | not (...) orient*   |
| <b>coperat</b> *   | not (...) coperat*  |
| <b>cooperat</b> *  | not (...) cooperat* |
| agitated           |                     |
| addled             | addled              |

A) Key words derived from the literature (**bold**) and further common terms used to describe patients experiencing delirium translated in English. B) Modified key words after the sample review. \*: indicates possible different endings. (...): any 0 to 12 characters.
